# Supplementary material for: Antitumor efficacy of a PLGA composite nanofiber embedded with doxorubicin@MSNs and hydroxycamptothecin@HANPs
Source: Royal Society of Chemistry journal article supplement (doi:10.1039/c4ra09122a), 2014-01-01
Supplement: c4ra09122a1.pdf [file c4ra09122a1.pdf]

## Electronic Supplementary Information

### **Antitumor efficacy of a PLGA composite nanofiber embedded with doxorubicin@MSNs and hydroxycamptothecin@HANPs**

Mengxia Chen,<sup>‡a</sup> Wei Feng,<sup>‡a</sup> Si Lin,<sup>a</sup> Chuanglong He,<sup>\*a</sup> Yu Gao<sup>b</sup> and Hongsheng Wang<sup>\*a</sup>

<sup>a</sup> College of Chemistry, Chemical Engineering and Biotechnology, Donghua University, 2999 North Renmin Road, Shanghai 201620, China.

<sup>\*</sup> Corresponding author. Phone and fax: +86 21 6779 2742. Email: whs@dhu.edu.cn and hcl@dhu.edu.cn.

<sup>b</sup> Research Institute of Donghua University, Donghua University, Shanghai 201620, China

<sup>‡</sup> These authors contributed equally to this paper.

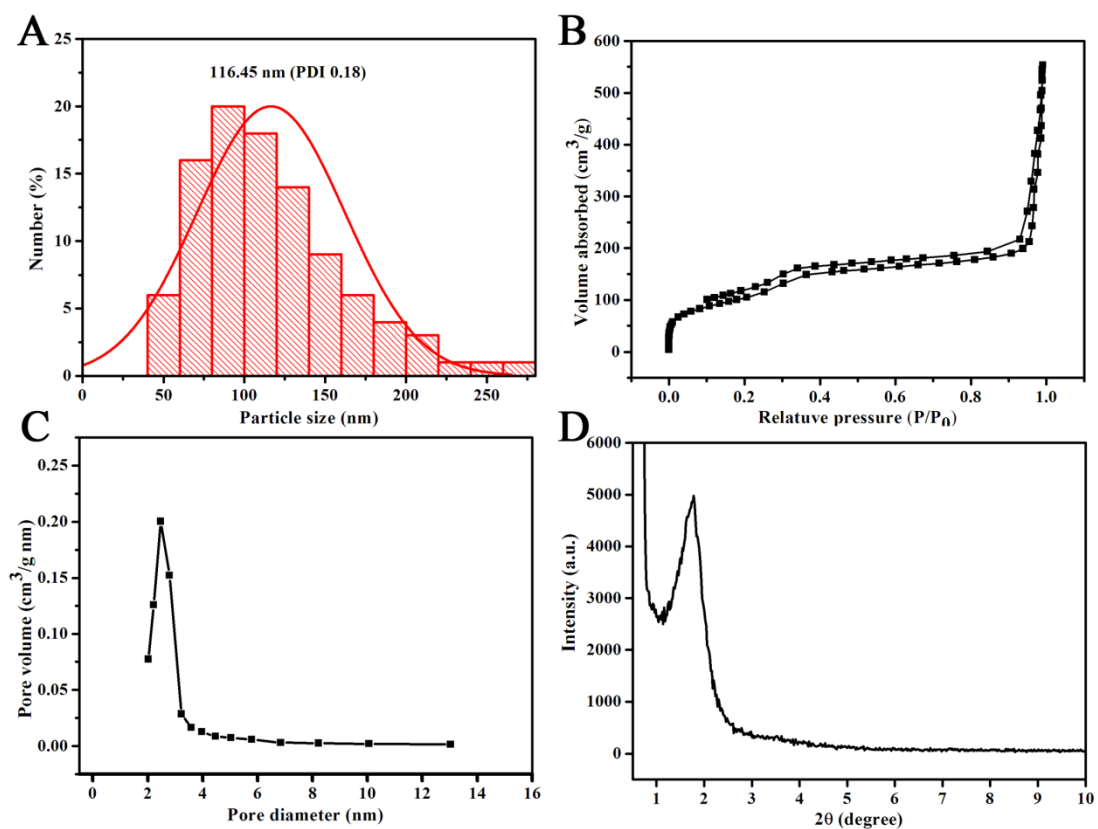

**Fig. S1** Size distribution and structure of MSNs. (A): size distribution; (B): nitrogen adsorption–desorption isotherms; (C): pore size distribution; (D): specific surface area of MSNs.

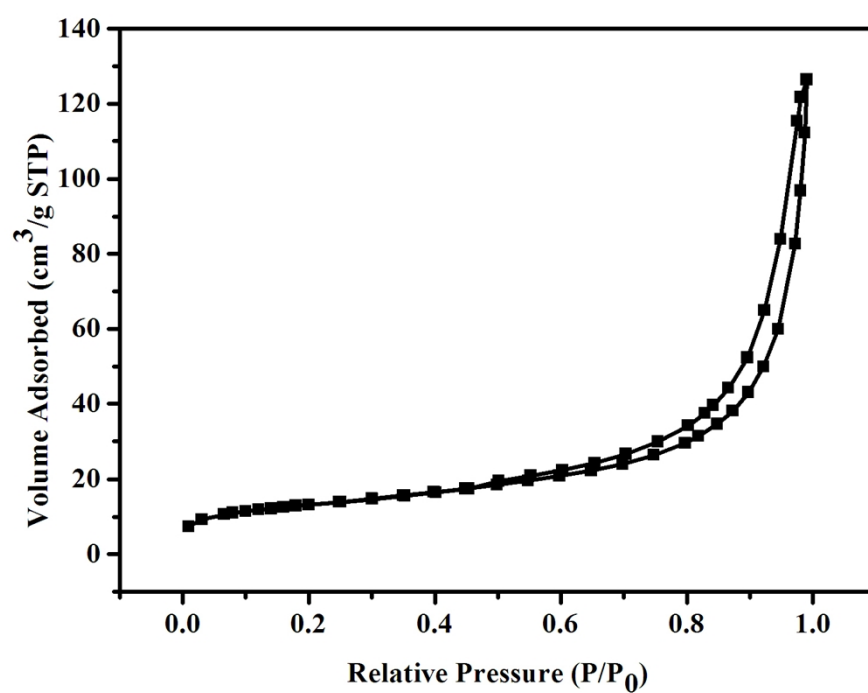

**Fig. S2** Nitrogen adsorption –desorption isotherms of HANPs.

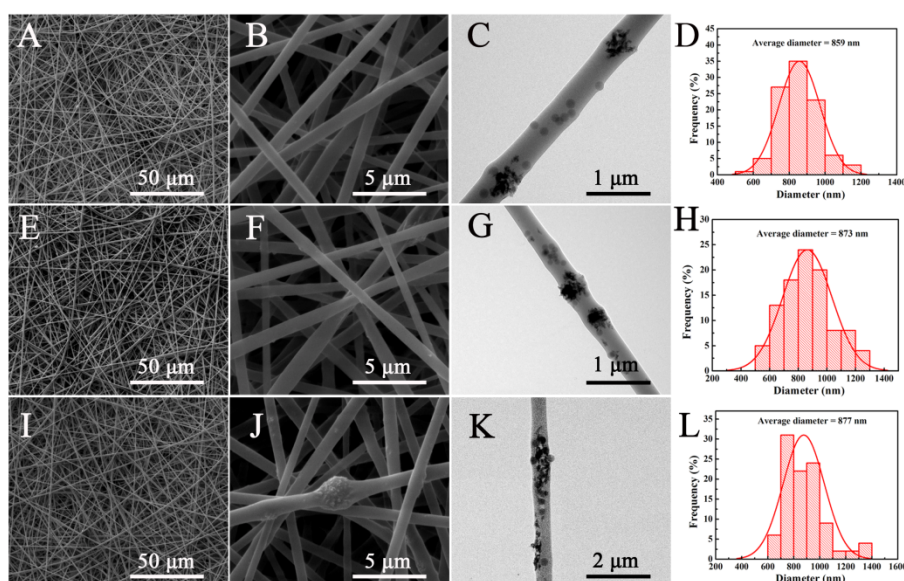

**Fig. S3** Micrograph and diameter distribution of PLGA/ MSNs& HANPs composite nanofibers. (A), (B), (E), (F), (I) and (J) are SEM images; (C), (G) and (K) are TEM images; (D), (H) and (L) are diameter distributions. (A)-(D): PLGA/5% MSNs & 2.5% HANPs composite nanofibers; (E)-(H): PLGA/2.5% MSNs & 5% HANPs composite nanofibers; (I)-(L): PLGA/5% MSNs & 5% HANPs composite nanofibers.

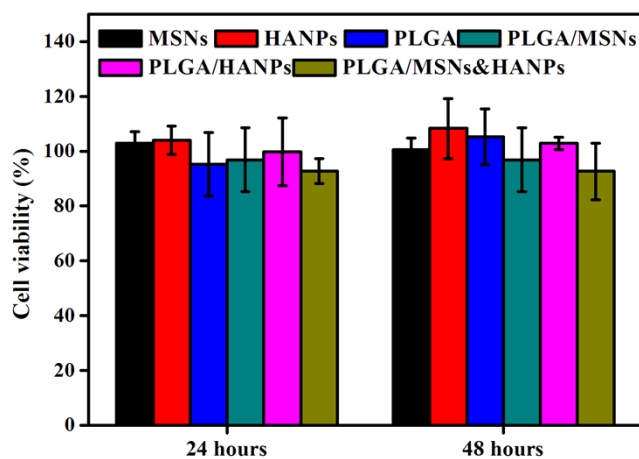

**Fig. S4** Cell viabilities of HeLa cells after treatment with different samples for 24 and 48 h *in vitro*.

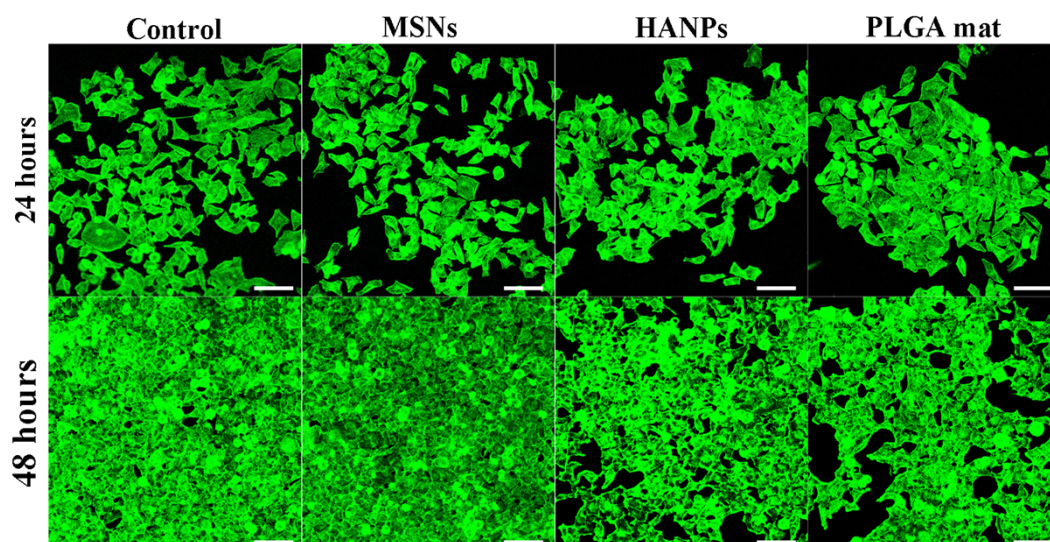

**Fig. S5** Confocal laser scanning microscopy images of HeLa cells treated with different samples for 24 and 48 h. Green represents Alexa Fluor@488 phalloidin-stained F-actin. Scale bars represent 100 μm.

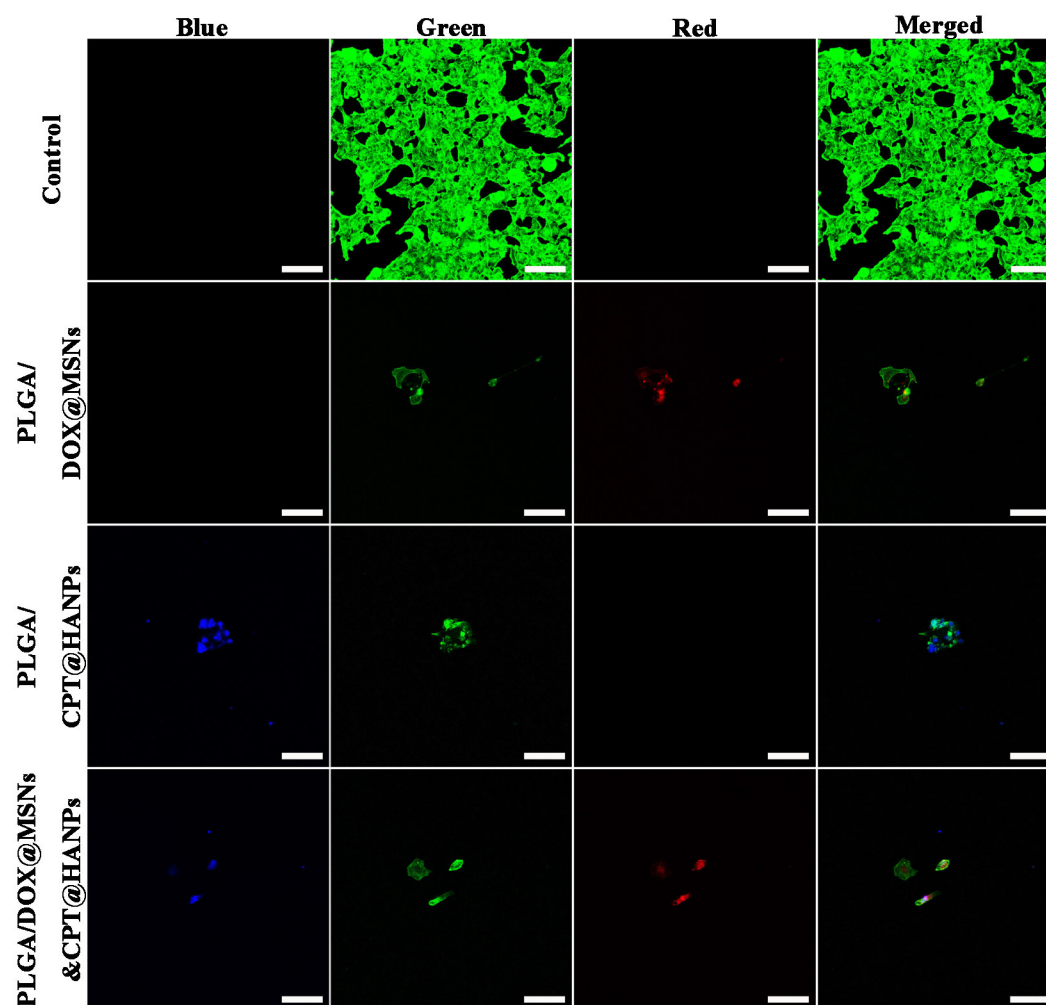

**Fig. S6** Confocal laser scanning microscopy images of HeLa cells treated with different samples

for 48 h. DOX and CPT concentration was 5.55 and 9.6  $\mu\text{g/mL}$ , respectively. Blue, green and red fluorescence respectively represent the released CPT, Alexa Fluor@488 phalloidin-stained F-actin and the released DOX. Scale bars represent 100 $\mu\text{m}$ .

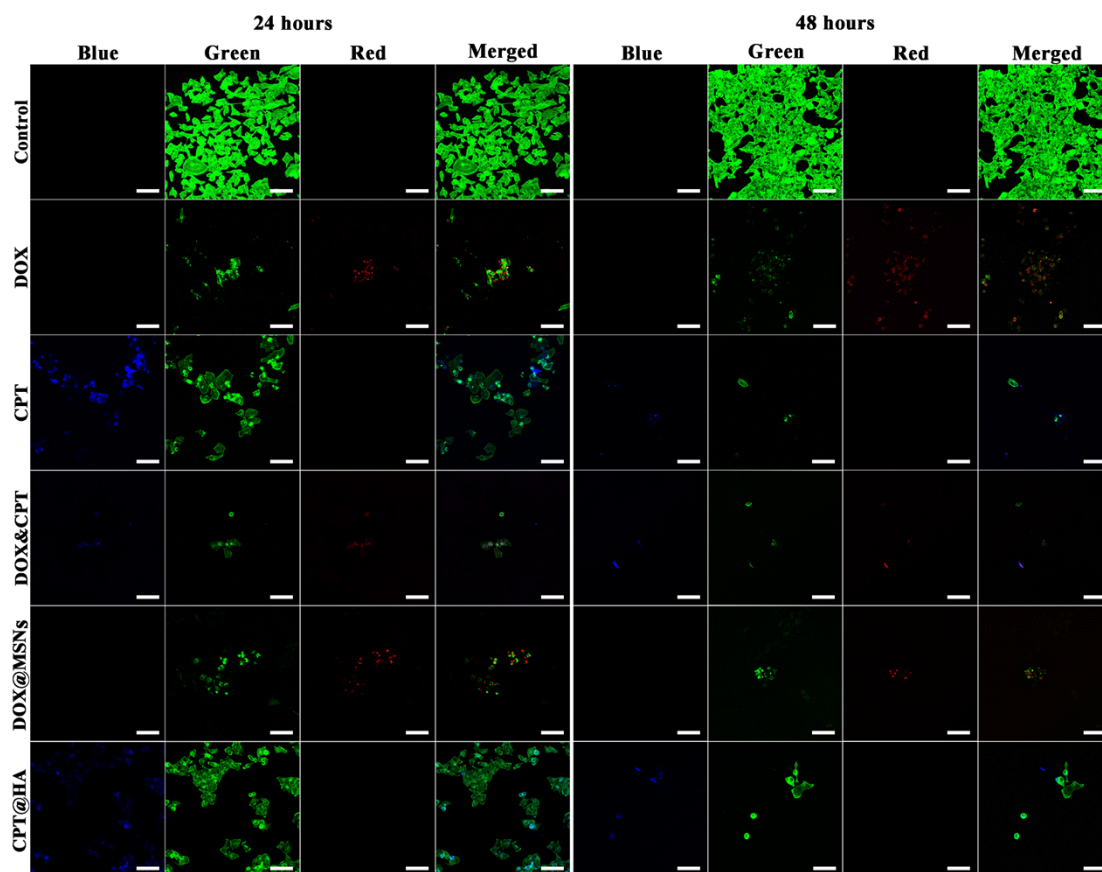

**Fig. S7** Confocal laser scanning microscopy images of HeLa cells treated with different samples for 24 and 48 h. DOX and CPT concentration was 5.55 and 9.6  $\mu\text{g/mL}$ , respectively. Blue, green and red fluorescence respectively represent the released CPT, Alexa Fluor@488 phalloidin-stained F-actin and the released DOX. Scale bars represent 100 $\mu\text{m}$ .
